# Supplementary material
Source: publisher site journal article supplement (https://www.spandidos-publications.com/4239/downloadSupplementary)

Figure S1. Efficacy of Ets-1 siRNA was determined using western blotting. \*P<0.05 vs. control. Ets-1, E26 transformation-specific sequence-1; si, short interfering; t-, total; N.C, negative control.

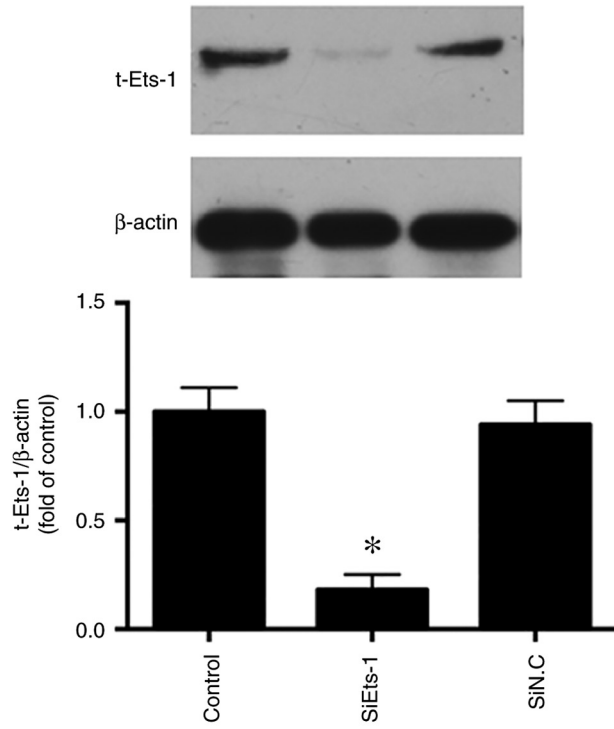

Supplement: Supplementary file 1 [file downloadSupplementary]
